# Supplementary material
Source: publisher figshare collection journal article supplement (https://osapublishing.figshare.com/ndownloader/files/27853578)
Supplement: Supplementary file 1 [file 27853578]

## **Separating and trapping of chiral nanoparticles with dielectric photonic crystal slabs: supplement**

**S. S. HOU, Y. LIU, W. X. ZHANG, AND X. D. ZHANG\***

*Key Laboratory of Advanced Optoelectronic Quantum Architecture and Measurements of Ministry of Education, Beijing Key Laboratory of Nanophotonics & Ultrafine Optoelectronic Systems, School of Physics, Beijing Institute of Technology, Beijing 100081, China*

\*[zhangxd@bit.edu.cn](mailto:zhangxd@bit.edu.cn)

---

This supplement published with The Optical Society on 3 May 2021 by The Authors under the terms of the [Creative Commons Attribution 4.0 License](#) in the format provided by the authors and unedited. Further distribution of this work must maintain attribution to the author(s) and the published article's title, journal citation, and DOI.

Supplement DOI: <https://doi.org/10.6084/m9.figshare.14459835>

Parent Article DOI: <https://doi.org/10.1364/OE.423243>

# Supplementary materials for

## “Separating and trapping of chiral nanoparticles with dielectric photonic crystal slabs”

**S.S. HOU, Y. LIU, W.X. ZHANG, AND X.D. ZHANG \***

*Key Laboratory of advanced optoelectronic quantum architecture and measurements of Ministry of Education, Beijing Key Laboratory of Nanophotonics & Ultrafine Optoelectronic Systems, School of Physics, Beijing Institute of Technology, 100081, Beijing, China*

\* [zhangxd@bit.edu.cn](mailto:zhangxd@bit.edu.cn)

To further understand the PhC slab with different Bloch modes, Fig. S1 shows the distributions of electric and magnetic fields in the unit cell of the PhC slab under the excitation of circularly polarized light (CPL). From the main text, we know that the PhC slab with  $t = 326.2$  nm has a quasi-fourfold degenerate mode, and the excitation wavelength is 719.8 nm. And the PhC slab with  $t = 280$  nm has double degenerate TM-like and TE-like modes. The excitation wavelengths of double degenerate TM-like and TE-like modes are 705.2 nm and 710.3 nm respectively. Comparing the distributions of electric and magnetic fields under the three excited Bloch modes in Fig. S1, it is obvious that the intensity of electric and magnetic fields with the PhC slab sustaining quasi-fourfold degenerate mode is much larger than that with separated double degenerate TE-like and TM-like modes. Besides, the electric field intensity of the PhC slab with double degenerate TM-like mode is larger than double degenerate TE-like mode, as shown in Fig. S1(a). And the magnetic field intensity of the PhC slab with double degenerate TM-like mode is smaller than double degenerate TE-like mode, as shown in Fig. S1(b). The results here are consistent with the results in Fig. 1 of the main text.

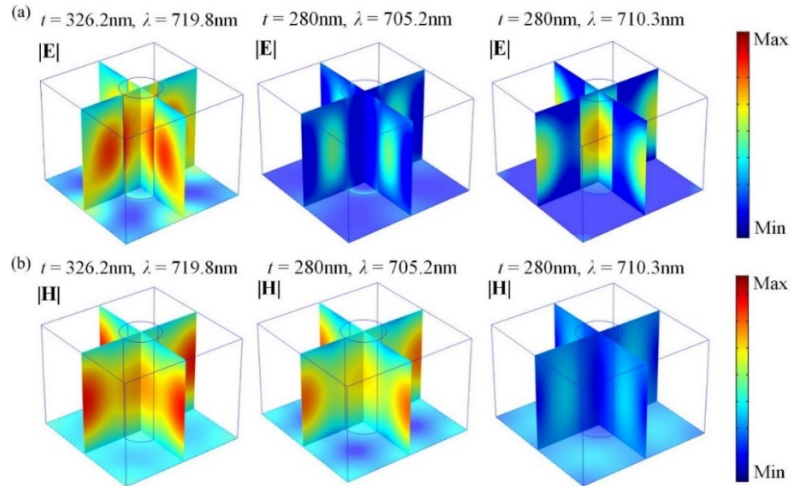

Fig. S1. The distributions of electric and magnetic fields in the unit cell of PhC slab under the excitation of CPL. (a) Electric field distributions at the excited quasi-fourfold degenerate mode ( $t = 326.2$  nm,  $\lambda = 719.8$  nm), double degenerate TM-like mode ( $t = 280$  nm,  $\lambda = 705.2$  nm) and double degenerate TM-like mode ( $t = 280$  nm,  $\lambda = 710.3$  nm) respectively. (b) Magnetic field distributions at the excited quasi-fourfold degenerate mode ( $t = 326.2$  nm,  $\lambda = 719.8$  nm), double degenerate TM-like mode ( $t = 280$  nm,  $\lambda = 705.2$  nm) and double degenerate TM-like mode ( $t = 280$  nm,  $\lambda = 710.3$  nm) respectively.
